# Supplementary material for: Absence of Rift Valley Fever Virus in Wild Small Mammals, Madagascar
Source: PubMed Central journal article supplement (PMC3713820; doi:10.3201/eid1906.121074), 2013-06
Supplement: 12-1074-Techapp-s1.pdf [file 12-1074-Techapp-s1.pdf]

# Absence of Rift Valley Fever Virus in Wild Mammals, Madagascar

## Technical Appendix

Technical Appendix Table. Taxonomy of small terrestrial animals sampled in Anjozorobe, Madagascar, October 2008 and 2009, March 2009 and 2010

| Order        | Family     | Species                          | No. |
|--------------|------------|----------------------------------|-----|
| Afrosoricida | Tenrecidae | <i>Hemicentetes semispinosus</i> | 25  |
|              |            | <i>Microgale dobsoni</i>         | 219 |
|              |            | <i>M. fotsifotsy</i>             | 3   |
|              |            | <i>M. gymnorhyncha</i>           | 3   |
|              |            | <i>M. longicaudata/majori</i>    | 8   |
|              |            | <i>M. parvula</i>                | 2   |
|              |            | <i>M. thomasi</i>                | 15  |
|              |            | <i>M. soricoides</i>             | 61  |
|              |            | <i>Oryzorictes hova</i>          | 38  |
|              |            | <i>Tenrec ecaudatus</i>          | 2   |
|              |            | <i>Setifer setosus</i>           | 2   |
| Rodentia     | Nesomyidae | <i>Eliurus majori</i>            | 15  |
|              |            | <i>E. minor</i>                  | 17  |
|              |            | <i>E. tanala</i>                 | 15  |
|              |            | <i>E. grandidieri</i>            | 3   |
|              |            | <i>Gymnuromys roberti</i>        | 11  |
|              |            | <i>Nesomys rufus</i>             | 53  |
|              | Muridae    | <i>Rattus rattus</i>             | 471 |
